# Supplementary material for: Erdafitinib Resensitizes ABCB1-Overexpressing Multidrug-Resistant Cancer Cells to Cytotoxic Anticancer Drugs
Source: MDPI journal article supplement (doi:10.3390/cancers12061366), 2020-05-26

Supplementary Materials

# Erdafitinib Resensitizes ABCB1-Overexpressing Multidrug-Resistant Cancer Cells to Cytotoxic Anticancer Drugs

Chung-Pu Wu, Tai-Ho Hung, Sung-Han Hsiao, Yang-Hui Huang, Lang-Cheng Hung, Yi-Jou Yu, Yu-Tzu Chang, Shun-Ping Wang and Yu-Shan Wu

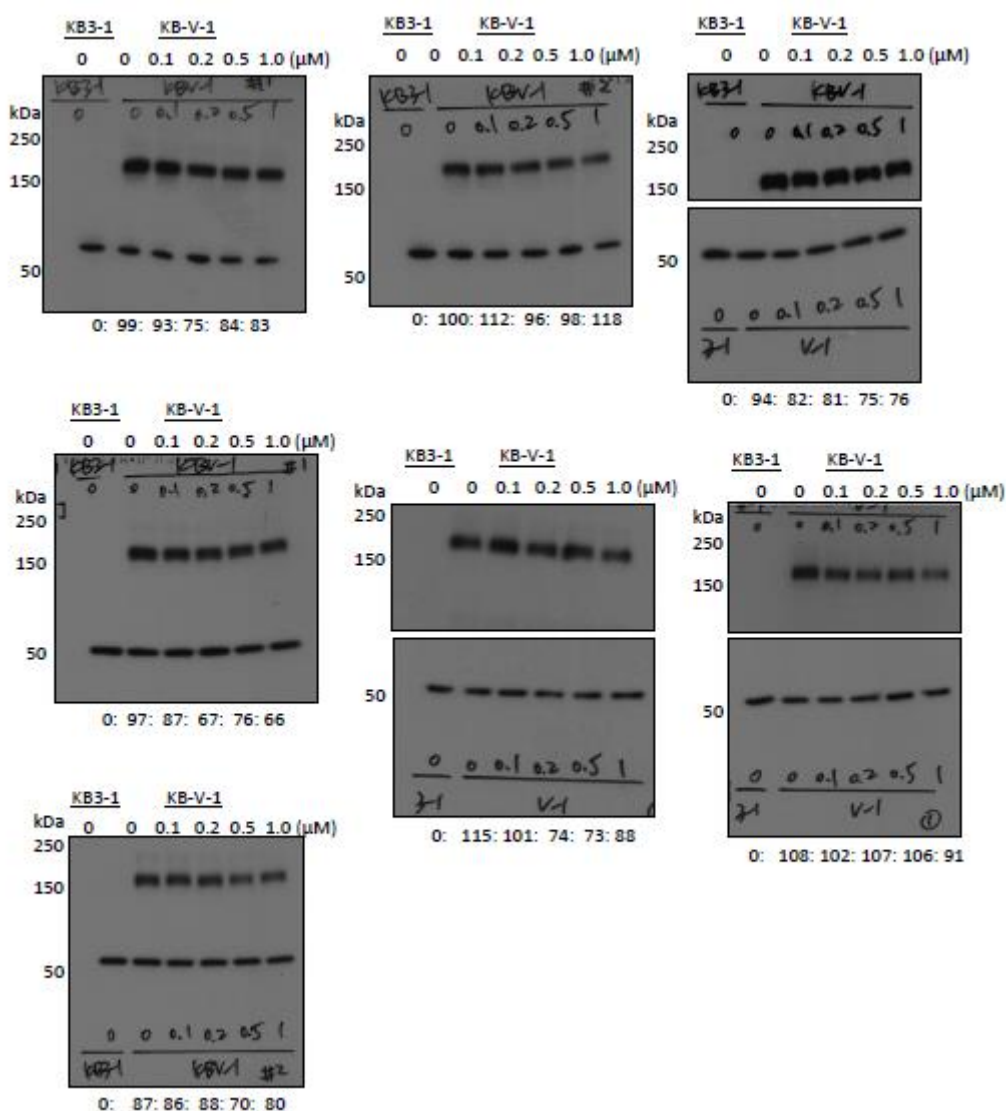

**Figure S1.** Expression of ABCB1 in human epidermal cancer KB-3-1 and KB-V-1 cancer cell lines.

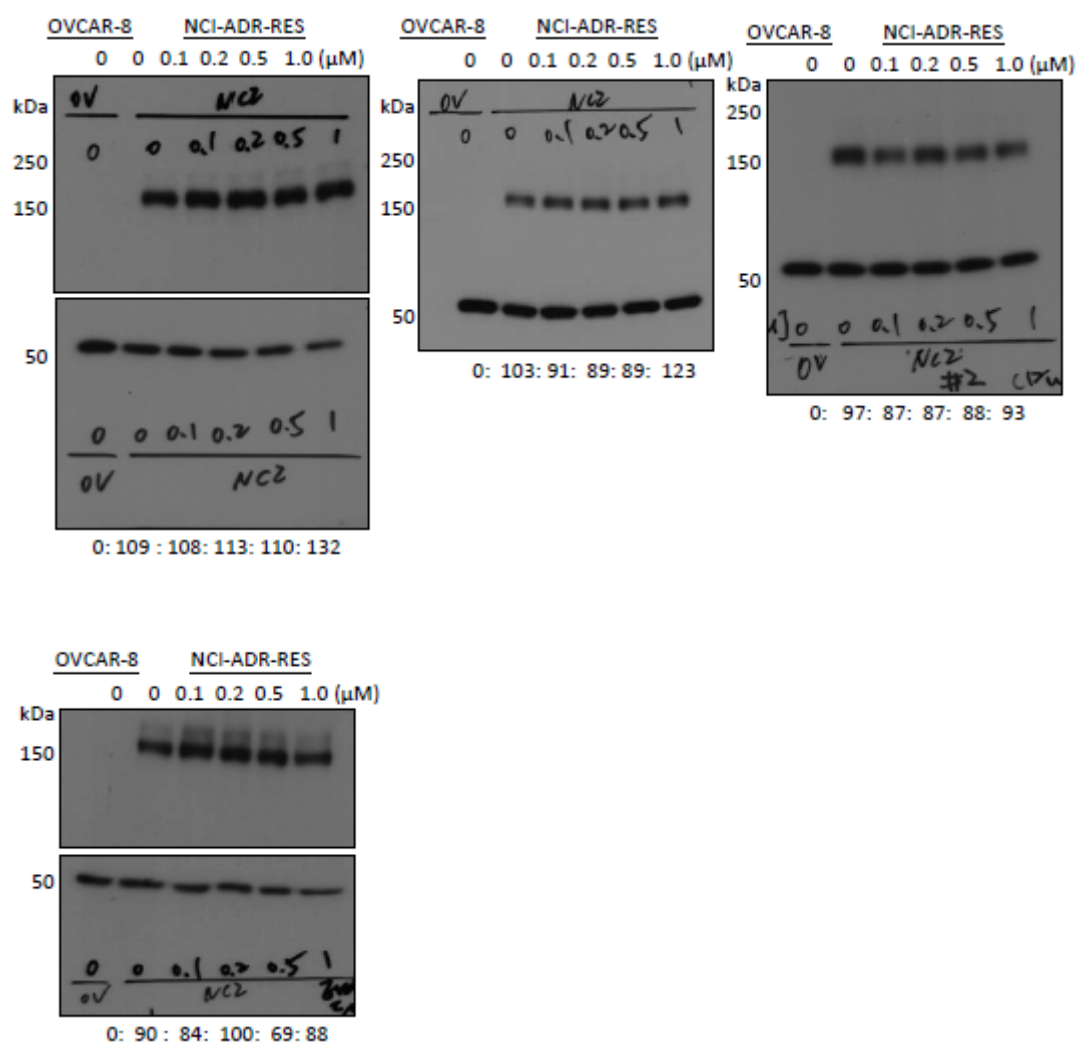

**Figure S2.** Expression of ABCB1 in human ovarian cancer OVCAR-8 and NCI-ADR-RES cancer cell lines.

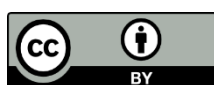

Supplement: s1 [file s1]
